# Supplementary material for: Ambulatory care management of 69 patients with acute severe ulcerative colitis in comparison to 695 inpatients: insights from a multicentre UK cohort study
Source: PubMed Central journal article supplement — BMJ Open Gastroenterol. 2022 Jan 31;9(1):e000763. doi: 10.1136/bmjgast-2021-000763 (PMC8804638; doi:10.1136/bmjgast-2021-000763), 2022-01-31
Supplement: bmjgast-2021-000763supp001.pdf [file bmjgast-2021-000763supp001.pdf]

**Supplementary Table 1:** Hospitals providing ambulatory patients to cohort

| Hospital                                                 | Time of ASUC episode:<br>COVID-19 pandemic vs. pre-pandemic period | Ambulatory                |                                                       |
|----------------------------------------------------------|--------------------------------------------------------------------|---------------------------|-------------------------------------------------------|
|                                                          |                                                                    | Ambulatory from diagnosis | Initially inpatient and then discharged to ambulatory |
| County Durham and Darlington NHS Foundation Trust        | Pandemic                                                           | 3                         | 6                                                     |
| East Suffolk and North Essex NHS Foundation Trust        | Pandemic                                                           |                           | 1                                                     |
| Hampshire Hospitals NHS Foundation Trust                 | Pre-pandemic                                                       |                           | 1                                                     |
| Hull University Teaching Hospitals NHS Trust             | Pandemic                                                           | 4                         |                                                       |
|                                                          | Pre-pandemic                                                       | 1                         | 2                                                     |
| Kettering General Hospital NHS Foundation Trust          | Pre-pandemic                                                       |                           | 1                                                     |
| Kingston Hospital NHS Foundation Trust                   | Pandemic                                                           |                           | 1                                                     |
| Lewisham and Greenwich NHS Trust                         | Pre-pandemic                                                       |                           | 1                                                     |
| Liverpool University Hospitals NHS Foundation Trust      | Pandemic                                                           | 6                         |                                                       |
| Maidstone and Tunbridge Wells NHS Trust                  | Pre-pandemic                                                       |                           | 1                                                     |
| NHS Greater Glasgow & Clyde                              | Pre-pandemic                                                       |                           | 1                                                     |
| Nottingham University Hospitals NHS Trust                | Pandemic                                                           |                           | 1                                                     |
|                                                          | Pre-pandemic                                                       |                           | 1                                                     |
| Pennine Acute Hospitals NHS Trust                        | Pandemic                                                           |                           | 6                                                     |
| Shrewsbury and Telford Hospital NHS Trust                | Pandemic                                                           |                           | 3                                                     |
|                                                          | Pre-pandemic                                                       |                           | 1                                                     |
| Southend University Hospital NHS Foundation Trust        | Pre-pandemic                                                       | 1                         |                                                       |
|                                                          | Pandemic                                                           |                           | 1                                                     |
| Stockport NHS Foundation Trust                           | Pandemic                                                           |                           | 2                                                     |
| The Royal Wolverhampton NHS Trust                        | Pandemic                                                           |                           | 3                                                     |
| The Royal Wolverhampton NHS Trust                        | Pre-pandemic                                                       |                           | 2                                                     |
| Torbay and South Devon NHS Foundation Trust              | Pandemic                                                           |                           | 1                                                     |
| University College London Hospitals NHS Foundation Trust | Pre-pandemic                                                       |                           | 5                                                     |
| University Hospitals Birmingham NHS Foundation Trust     | Pandemic                                                           |                           | 4                                                     |
| University Hospitals Of Leicester NHS Trust              | Pandemic                                                           |                           | 1                                                     |
| West Hertfordshire Hospitals NHS Trust                   | Pre-pandemic                                                       |                           | 1                                                     |
| Wirral University Teaching Hospital NHS Foundation Trust | Pandemic                                                           |                           | 7                                                     |
| <b>TOTAL</b>                                             |                                                                    | <b>15</b>                 | <b>54</b>                                             |
