# Supplementary material for: Ambulatory care management of 69 patients with acute severe ulcerative colitis in comparison to 695 inpatients: insights from a multicentre UK cohort study
Source: PubMed Central journal article supplement — BMJ Open Gastroenterol. 2022 Jan 31;9(1):e000763. doi: 10.1136/bmjgast-2021-000763 (PMC8804638; doi:10.1136/bmjgast-2021-000763), 2022-01-31
Supplement: bmjgast-2021-000763supp002.pdf [file bmjgast-2021-000763supp002.pdf]

## Study contributors and institutions

| Institution                                                     | Contributors                                                                                                            |
|-----------------------------------------------------------------|-------------------------------------------------------------------------------------------------------------------------|
| Airedale NHS Foundation Trust                                   | Richard Shenderey<br>Kalyan Peddada<br>Emma Dooks                                                                       |
| Barts Health NHS Trust                                          | James Oliver Lindsay<br>Jennifer Murray<br>Aaron Bancil                                                                 |
| Basildon and Thurrock University Hospitals NHS Foundation Trust | Zia Mazhar<br>Leila Mebarek<br>Aarani Mahalingam<br>Christopher Palmer-Jones<br>Jacqueline Roscoe                       |
| Belfast Health & Social Care Trust                              | Graham Morrison<br>Stephen Boyle                                                                                        |
| Blackpool Teaching Hospitals NHS Foundation Trust               | Rhys Butcher<br>Tom Riley<br>Aye Mya Htun                                                                               |
| Bolton NHS Foundation Trust                                     | Salil Singh<br>Kelly Chatten<br>Ruth Tunney                                                                             |
| Cardiff and Vale University Health Board                        | Barney Hawthorne<br>Bradley Arms-Williams<br>Alexander Berry<br>Janardhan Navaratnam                                    |
| Chelsea and Westminster Hospital NHS Foundation Trust           | Richard Appleby<br>Emma Johnston<br>Sharmili Balarajah<br>Larissa Good<br>Holli Evans                                   |
| County Durham and Darlington NHS Foundation Trust               | Anjan Dhar<br>Susan Ritchie                                                                                             |
| Croydon Health Services NHS Trust                               | Mike Mendall<br>Amy Woods<br>Homira Ayubi                                                                               |
| East Suffolk and North Essex NHS Foundation Trust               | Achuth Shenoy<br>Thomas Hutton<br>Joy Mason<br>Deanna Naylor<br>Kelly Turner                                            |
| East Sussex Healthcare NHS Trust                                | Steven Fong<br>Frederic Cuison<br>Hesam Nooredinvand<br>Sophia Bishop<br>Murad Bayati<br>Muteeb Ashraf<br>Mansoor Zafar |
| Guy's and St Thomas' NHS Foundation Trust                       | Peter Irving<br>Raphael Peter Luber<br>Jennifer Clough<br>Samuel Lim<br>Mark Samaan                                     |
| Hampshire Hospitals NHS Foundation Trust                        | John Gordon<br>Deborah Britton                                                                                          |

|                                                     |                                                                                                                                                                         |
|-----------------------------------------------------|-------------------------------------------------------------------------------------------------------------------------------------------------------------------------|
|                                                     | Sarah Cotton<br>Emma Levell<br>Foteini Karagkouni<br>Fiona Kirkham                                                                                                      |
| Harrogate and District NHS Foundation Trust         | Ganesh Sivaji<br>Mary Elias<br>Mais Khasawneh                                                                                                                           |
| Hull University Teaching Hospitals NHS Trust        | Shaji Sebastian<br>Haidee Aleman Gonzalez<br>Jessica Lisle<br>Sally Myers                                                                                               |
| Imperial College Healthcare NHS Trust               | Lucy Hicks<br>Nick Powell<br>Jonathan Segal<br>Alexander Cole<br>Rishi Fofaria<br>Yousuf Sherifat<br>Akram Ali<br>Callum Watson<br>Anita D'Souza<br>Aurélien M Guérault |
| Kettering General Hospital NHS Foundation Trust     | Ajay M Verma<br>Solange Serna<br>Amjad Ali<br>Mohammad Peerally                                                                                                         |
| King's College Hospital NHS Foundation Trust        | Alexandra Kent<br>Aamir Saifuddin<br>Ali El Rida El Masri<br>Christopher Harlow<br>Martyn Lakeland<br>Hanin Ramadan                                                     |
| Kingston Hospital NHS Foundation Trust              | Jonathan Nolan<br>Beverley Kirkham<br>Andres Naranjo<br>Rosaleen Herdman-Grant                                                                                          |
| Lancashire Teaching Hospitals NHS Foundation Trust  | Michael Finegan<br>Liam Morris<br>Joseph Sabine<br>Mutwakil Musharaf                                                                                                    |
| Leeds Teaching Hospitals NHS Trust                  | Christian Selinger<br>Elaine Ong Ming San<br>Konstantina Rosiou                                                                                                         |
| Lewisham and Greenwich NHS Trust                    | Mina Hanna<br>Bo Wang<br>Laura Blackmore<br>Tracy Naughton<br>Samantha Baillie                                                                                          |
| Liverpool University Hospitals NHS Foundation Trust | Sreedhar Subramanian<br>Ashley Bond<br>Philip Smith<br>Tristan Townsend<br>Thomas Conley                                                                                |
| London North West University Healthcare NHS Trust   | Ailsa Hart<br>Naila Arebi<br>Lovesh Dyall                                                                                                                               |

|                                                              |                                                                                                                                                                                                                  |
|--------------------------------------------------------------|------------------------------------------------------------------------------------------------------------------------------------------------------------------------------------------------------------------|
|                                                              | <p>Sonia Bouri<br/> Roosey Sheth<br/> Lisa Younge<br/> Susie Wen<br/> Pineshwari Naeck-Boolaiky<br/> Comfort Okpoh</p>                                                                                           |
| Luton and Dunstable University Hospital NHS Foundation Trust | <p>Matthew Johnson<br/> Cynthia Kanagasundaram<br/> Joya Bhattacharyya<br/> Kasamu Kabiru Dawa</p>                                                                                                               |
| Maidstone and Tunbridge Wells NHS Trust                      | <p>Rafid Sikafi<br/> Flora Kokwaro<br/> Eleanor Warner<br/> Maureen Williams<br/> Anum Javed</p>                                                                                                                 |
| Manchester University NHS Foundation Trust                   | <p>Simon Borg-Bartolo<br/> Karen Kemp<br/> Kirsty Nixon<br/> Johannah Cook<br/> Kirsty Nixon<br/> Scott Levison<br/> Willow Howard<br/> Andrea Au</p>                                                            |
| Medway NHS Foundation Trust                                  | <p>Nivedita Ghosh<br/> Pantong Dawwar<br/> Olaolu Olabintan</p>                                                                                                                                                  |
| Newcastle upon Tyne Hospitals NHS Foundation Trust           | <p>Christopher Lamb<br/> R Alexander Speight<br/> Robert Mulligan<br/> Andrew King<br/> Ruth Owen</p>                                                                                                            |
| NHS Greater Glasgow & Clyde                                  | <p>John Paul Seenan<br/> Jonathan MacDonald<br/> Roisin Campbell<br/> Iona Campbell<br/> Chris Curran<br/> Jayne Saunders</p>                                                                                    |
| NHS Lothian                                                  | <p>Shahida Din<br/> Eleanor Watson<br/> Antonia Churchhouse<br/> Peter Cartlidge<br/> Hannah Walton<br/> Laura Lucaciu<br/> Spyros Siakavellas<br/> Gareth-Rhys Jones<br/> Victoria Moffat<br/> Charlie Lees</p> |
| Northern Health and Social Care Trust                        | <p>Kok Leong Diong<br/> Leah Gilroy<br/> Hannah McCaughan</p>                                                                                                                                                    |
| Northern Lincolnshire and Goole NHS Foundation Trust         | <p>Shahzad Sarwar<br/> Najeebullah Khan<br/> Rebecca Perkins<br/> Farah Qayyum<br/> Caitlin Brown<br/> Updesh Singh</p>                                                                                          |

|                                                   |                                                                                                                                           |
|---------------------------------------------------|-------------------------------------------------------------------------------------------------------------------------------------------|
| Nottingham University Hospitals NHS Trust         | Gordon W Moran<br>Shellie Radford<br>Frank Phillips<br>Matthew Shale<br>Ana-Maria Darie                                                   |
| Pennine Acute Hospitals NHS Trust                 | Jimmy Limdi<br>Anish John Kuriakose Kuzhiyanjal<br>Mohammed Korani<br>Ayodele Sasegbon<br>Joanne Taylor                                   |
| Royal Devon & Exeter NHS Foundation Trust         | Nick Kennedy<br>Desmond Chee<br>Keith Pohl                                                                                                |
| Royal Free London NHS Foundation Trust            | Charles Murray<br>Robin Dart<br>Siobhan Rowland<br>Holly Lyne                                                                             |
| Royal Wolverhampton NHS Trust                     | Helen Steed<br>Matthew Brookes<br>Aditi Kumar<br>Kishaani Suseeharan<br>Sonika Sethi<br>Precious Aghimien<br>Priya Sarkar<br>Saleha Azhar |
| Salford Royal NHS Foundation Trust                | Catherine Stansfield<br>Emma Nixon<br>Elizabeth Ratcliffe<br>Abdul Basit<br>Uche Nosegbe                                                  |
| Sheffield Teaching Hospitals NHS Foundation Trust | Alan Lobo<br>Ammar Al-Rifaie<br>Alhassan Ghodeif                                                                                          |
| Shrewsbury and Telford Hospital NHS Trust         | Jeff Butterworth<br>Gill Townsend<br>Jad Alkhoury<br>Abdullah Abbasi<br>Nosheen Umar<br>Asima Javed<br>Shukri Abdale                      |
| South Eastern Health & Social Care Trust          | Patrick Allen<br>Tony Tham<br>Neil Bradley<br>Andy Spence                                                                                 |
| South Tees Hospitals NHS Foundation Trust         | Arvind Ramadas<br>Anwar Abusrewil<br>Emma Botwright                                                                                       |
| Southend University Hospital NHS Foundation Trust | Ioannis Koumoutsos<br>Sophie Laverick<br>Vithushan Vakeeswarasarma<br>Donatas Taucius                                                     |
| Southern Health & Social Care Trust               | Shivaram Bhat<br>Gary Morrison<br>Richard Fox<br>Christian Frunza<br>Stuart Mcilwaine                                                     |

|                                                            |                                                                                                                                                                                                                                                         |
|------------------------------------------------------------|---------------------------------------------------------------------------------------------------------------------------------------------------------------------------------------------------------------------------------------------------------|
| St George's University Hospitals NHS Foundation Trust      | Kamal Patel<br>Richard Pollok<br>Nishani Jayasooriya<br>Nicola Grasso                                                                                                                                                                                   |
| St Helens and Knowsley Teaching Hospitals NHS trust        | Rajiv Chandy<br>Reema Jagdish<br>Nirmol Meah<br>Julie Henshaw                                                                                                                                                                                           |
| Stockport NHS Foundation Trust                             | Rachel Campbell                                                                                                                                                                                                                                         |
| Torbay and South Devon NHS Foundation Trust                | Gareth Walker<br>Yuen-Hui Lim<br>James Gulliver                                                                                                                                                                                                         |
| University College London Hospitals NHS Foundation Trust   | Shameer Mehta<br>Gregory Sebepos-Rogers<br>Hazel Wallace                                                                                                                                                                                                |
| University Hospital Southampton NHS Foundation Trust       | Markus Gwiggner<br>Richard Felwick<br>Louise Downey<br>Sohail Rahmany<br>Sara Chughtai<br>Radharetnas Meiarasu<br>Bilal Khurshid<br>Tilly Mills                                                                                                         |
| University Hospitals Birmingham NHS Foundation Trust       | Neeraj Bhala<br>Mohammed Nabil Quraishi<br>Adam McCulloch<br>Thomas Troth<br>Rachel Cooney<br>Amar Singh<br>Ridhima Malakar<br>Sara Mahgoub<br>Maria Qurashi<br>Tamsin Critchlow<br>Peter Rimmer<br>Jonathan Cheesbrough<br>Nasir Mir<br>Nassir Hussain |
| University Hospitals Bristol NHS Foundation Trust          | Aileen Fraser<br>Ruth Carr<br>Josiah Carter                                                                                                                                                                                                             |
| University Hospitals Coventry and Warwickshire NHS Trust   | Ramesh Arasaradnam<br>Benjamin Disney<br>Monika Widlak<br>Maria Tabuso                                                                                                                                                                                  |
| University Hospitals of Leicester NHS Trust                | Patricia Hooper<br>Saeed Ahmed<br>Hesham Khalil                                                                                                                                                                                                         |
| University Hospitals of Morecambe Bay NHS Foundation Trust | Sarah Guthrie<br>Wendy Harrison<br>Hayley Owen                                                                                                                                                                                                          |
| West Hertfordshire Hospitals NHS Trust                     | Rakesh Chaudhary<br>Amit Thakor<br>Katharina Wallis<br>Jentus Milton<br>Cheryl Kemp                                                                                                                                                                     |
| Weston Area Health NHS Trust                               | Andrew Bell                                                                                                                                                                                                                                             |

|                                                             |                                                                      |
|-------------------------------------------------------------|----------------------------------------------------------------------|
|                                                             | Fenella Marley<br>Archibald Coulter                                  |
| Wirral University Teaching Hospital NHS Foundation<br>Trust | Paul Flanagan<br>Tamar Avades<br>Anne Reddington<br>Fiona Brailsford |
